# Supplementary material
Source: publisher figshare collection journal article supplement (https://gsajournals.figshare.com/ndownloader/files/23665601)
Supplement: Supplementary file 1 [file 23665601]

## Sheet: Sheet 1
Table S1. List of primers for disruption by homologous recombination used in the study.
Gene	Forward Primer 5'-3'	Reverse Primer 5'-3'	Replacement	Reference
NDJ1	ATGAGTAAGGATAATAGGTTAGCAAGTATTTTGCTGCAGCCTGTAG CACAGGAAACAGCTATGACC	TTAACAATTCAGAATCTCATCTGTAAAGCATTGTAATATCGCTGAAGTTGTAAAACGACGGCCAGT	KlURA3	This study
AAD15	TTGAGCGTGATATTATTCCAATGGCTAGGCATTTCGGTATGGCCCTCACAGGAAACAGCTATGACC	AAACATTATTCGTACCATATTTTTGAGTCAAGGAATTTAACACGATAGTTGTAAAACGACGGCCAGT	KlURA3	This study
NFG1	CCCTCCGTTTCATCATCCTATAGCTCGTCAACAAATCAAAAAAAATCACAGGAAACAGCTATGACC	TTGTTTAAGAAAACAAATAAGCGATTGTTTCTAACATTAAAACGAAGTTGTAAAACGACGGCCAGT	KlURA3	This study
TIP1	ATGTCCGTTTCCAAGATTGCTTTCGTTTTAAGTGCCATTGCCTCTTCACAGGAAACAGCTATGACC	TAACAATAAAGCAGCTGCACCTGCAACAACAGCACCGAAAGAGGCAGTTGTAAAACGACGGCCAGT	KlURA3	This study
SFG1	ATGGATGAAATGCATTCTTCAGACACACTTTTGTTGCGAACACCGACACAGGAAACAGCTATGACC	AGTTATTGTTCTAAAACCTTTGCCCACTGAACTTTTTTGTAGTCCTGTTGTAAAACGACGGCCAGT	KlURA3	This study
RPI1	ATGTACTTGGAATATCTTCAACCGAAGTTGAACCTAATGGATGAGTCACAGGAAACAGCTATGACC	TTTAATGTTGTTGCATAAAATTTTCTGAGTCTGAAGTTGACATATTGTTGTAAAACGACGGCCAGT	KlURA3	This study
SVS1	ATGATTTTCAAAATATTGTGTAGTTTACTACTGGTAACCTCCAACTCACAGGAAACAGCTATGACC	TTAAATGTGGGTACCGTTGTTAGCAGAACCTGTAACATTACTAGCAGTTGTAAAACGACGGCCAGT	KlURA3	This study
MNN5	TACTAATAGTTCAGGTTACAATGCTGATTAGGTTAAAGAAGAGAAACACAGGAAACAGCTATGACC	GATAATTAACATGATTGGTCAAATACTCACACATTGCATCCCATTCGTTGTAAAACGACGGCCAGT	KlURA3	This study
PRY2	ATGAAATTTTCTAAAGTCTCACTACTGGCCGCATCTGCATCTGTCGCACAGGAAACAGCTATGACC	TTAAGCTAATGGCATAACGTTGTCAGCAAACTCACCAATGACATTACGTTGTAAAACGACGGCCAGT	KlURA3	This study
WSC2	ATGCACCTAGATCTCATACACAAGTCCTTCATCTTAGTGTGGCTCACACAGGAAACAGCTATGACC	TCAGCGCAAAGAACTATTATTGGAATCCTTTGCATCATCGTAATCAGTTGTAAAACGACGGCCAGT	KlURA3	This study
RGD2	CCGTTGAATTGTAATAGATGTTGTACACCTGCAAGCGAGCATGCTACACAGGAAACAGCTATGACC	AATTCGTGAAAAATCTGTTTCTTATGTGTCAGTAGATCATAGAAAAGTTGTAAAACGACGGCCAGT	KlURA3	This study
PRM5	ATGACAGTAATCACCATTGCCAAGAGAGGCCTTCCAAAATTAACCACACAGGAAACAGCTATGACC	TTACTCATCCTGTTCTTTCCCCTCCAGCATGTGCTCGAGATAAGTCGTTGTAAAACGACGGCCAGT	KlURA3	This study
YNL058C	GGCAGAGATGGTTAAGAAAAACTTTATCCCGTCTGTATCGCTGGTCAATAGGCCACTAGTGGATCTG	ACTTCAAGGCAAAAGTGTTTAATATTTATACGCGGATCATGATTGCAGCTGAAGCTTCGTACGC	NAT	This study
WSC3	TATAAAATGGAAAGAGTATGGTTTGCAAAATTAACAAATAAAGGAAATAGGCCACTAGTGGATCTG	CACTCACTACGCTGCTAAATTTGATCATTTGGTGAATAATTTGATAAGCTGAAGCTTCGTACGC	NAT	This study
DSE4	ATGCAATTATATCTGACACTTCTTTTTCTATTAAGTTTCGTCGAATCACAGGAAACAGCTATGACC	GAAAATGCTAATGCCCATGTGCGACTCATTCCGTTATCCAAATATGGTTGTAAAACGACGGCCAGT	KlURA3	This study
DSE1	ATGCAAGATACCAAATACTACGAACCAACAAATATTTTTCGTCAGCCACAGGAAACAGCTATGACC	CTAGACAACAGTAGTATCAATAGTAGATCCACTTAAATGCACATCAGTTGTAAAACGACGGCCAGT	KlURA3	This study
SCW11	ATGATTTCACCCATAAGCTTTCTATCATCGCTGCTATGCTTATAGACACAGGAAACAGCTATGACC	ATATTCAATCACACCGAAAGATTGTTCGATACCGTAATCACCGGGAGGTTGTAAAACGACGGCCAGT	KlURA3	This study
DSE2	GCCACTCCTTTAACAAATTACAAAGAAATGAAATTTAATTTTTCTACACAGGAAACAGCTATGACC	CTAAATGGTAACCGTAGCATAAATTGTGTTTGTACTAGTTATAGTGGTTGTAAAACGACGGCCAGT	KlURA3	This study
HUG1	ATGACCATGGACCAAGGCCTTAACCCAAAGCAATTCTTCCTTGACGCACAGGAAACAGCTATGACC	AAAAAAGAGAAGCATGCTCTTAGTTGGAAGTATTCTTACCAATGTCGTTGTAAAACGACGGCCAGT	KlURA3	This study
SRL1	ATGCTTCAATCCGTTGTCTTTTTCGCTCTTTTAACCTTCGCAAGTTATAGGCCACTAGTGGATCTG	CCCTTAAGATCTTACCAACTATCCAATGTCGACTAGTTCGTGAGACAGCTGAAGCTTCGTACGC	NAT	This study
RGD2	CCGTTGAATTGTAATAGATGTTGTACACCTGCAAGCGAGCATGCTAATAGGCCACTAGTGGATCTG	AATTCGTGAAAAATCTGTTTCTTATGTGTCAGTAGATCATAGAAAAAGCTGAAGCTTCGTACGC	KANMX6	This study
RPI1	ATGTACTTGGAATATCTTCAACCGAAGTTGAACCTAATGGATGAGTATAGGCCACTAGTGGATCTG	TTTAATGTTGTTGCATAAAATTTTCTGAGTCTGAAGTTGACATATTAGCTGAAGCTTCGTACGC	HYG	This study
TIP1	ATGTCCGTTTCCAAGATTGCTTTCGTTTTAAGTGCCATTGCCTCTTATAGGCCACTAGTGGATCTG	TAACAATAAAGCAGCTGCACCTGCAACAACAGCACCGAAAGAGGCAAGCTGAAGCTTCGTACGC	NAT	This study
RHO5	TAATAAGTCTGATGAGGTCTATTAAATGTGTGATAATTGGTGATGGATAGGCCACTAGTGGATCTG	TTAATAATACTTTACTGTATTCTGTTGTACCCCATATTGTGGCTGTAGCTGAAGCTTCGTACGC	NAT	This study
